# Supplementary material for: Promotion of the Efficient Electrocatalytic Production of H2O2 by N,O- Co-Doped Porous Carbon
Source: MDPI journal article supplement (doi:10.3390/nano13071188), 2023-03-27
Supplement: s1 [file s1]

# Promotion the Efficient electrocatalytic production of H<sub>2</sub>O<sub>2</sub> by N,O-co-doped porous carbon

Sun Lina <sup>a,b</sup>, Sun Liping <sup>a\*</sup>, Huo Lihua <sup>a</sup>, Zhao Hui<sup>a\*</sup>

a Key Laboratory of Functional Inorganic Material Chemistry, Ministry of Education, School of Chemistry and Materials Science, Heilongjiang University, Harbin 150080, P. R. China

b Key Laboratory of Molten Salts and Functional Materials of Heilongjiang Province, School of Science, Heihe University, Heihe 164300, P. R. China

## 1. Quantification of H<sub>2</sub>O<sub>2</sub>

Based on the reduction of Ce<sup>4+</sup> (yellow) to Ce<sup>3+</sup> (colorless) by H<sub>2</sub>O<sub>2</sub> in acidic solution, the H<sub>2</sub>O<sub>2</sub> (HO<sub>2</sub><sup>-</sup>) produced in bulk electrolysis was measured by Ce(SO<sub>4</sub>)<sub>2</sub> titration method. The produced H<sub>2</sub>O<sub>2</sub> is Quantitatively analyzed based on the following equation

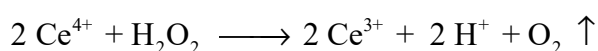

Based on the fact that the intensity of Ce<sup>4+</sup> adsorption peak at 318 nm is proportional to its concentration, a series of Ce(SO<sub>4</sub>)<sub>2</sub> solutions with known concentration are prepared and the standard curve is plotted by Ce<sup>4+</sup> concentration vs. the intensity of adsorption peak. Next, to quantify the produced H<sub>2</sub>O<sub>2</sub>, a certain volume of sample solution is mixed with 0.5 mM Ce<sup>4+</sup> solution. After standing for 2 h, the mixture solution is measured by UV-vis spectrophotometry. The yield of H<sub>2</sub>O<sub>2</sub> is then determined based on the reduced Ce<sup>4+</sup> concentration.

---

\* Corresponding author. Tel.: +86 45186608426; fax: +86 45186608426.

E-mail address: sunliping@hlju.edu.cn (L-P. Sun), zhaohui98@hlju.edu.cn (H. Zhao)

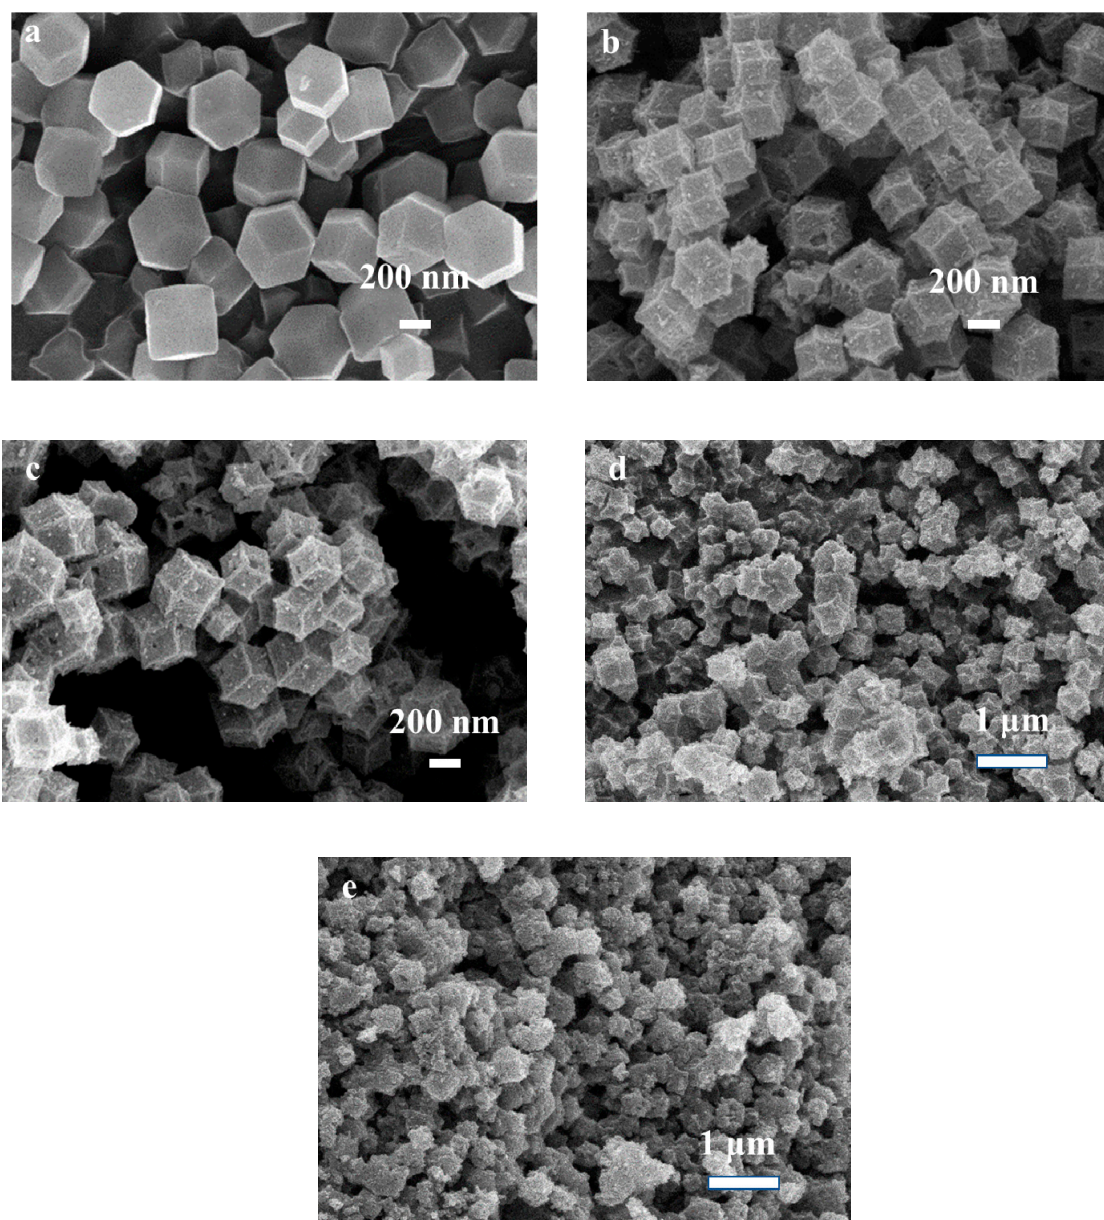

**Figure S1** SEM image of the catalyst. (a) ZIF-67. (b) NPC-900. (c) O-NPC-80. (d) O-NPC-100. (e) O-NPC-120.

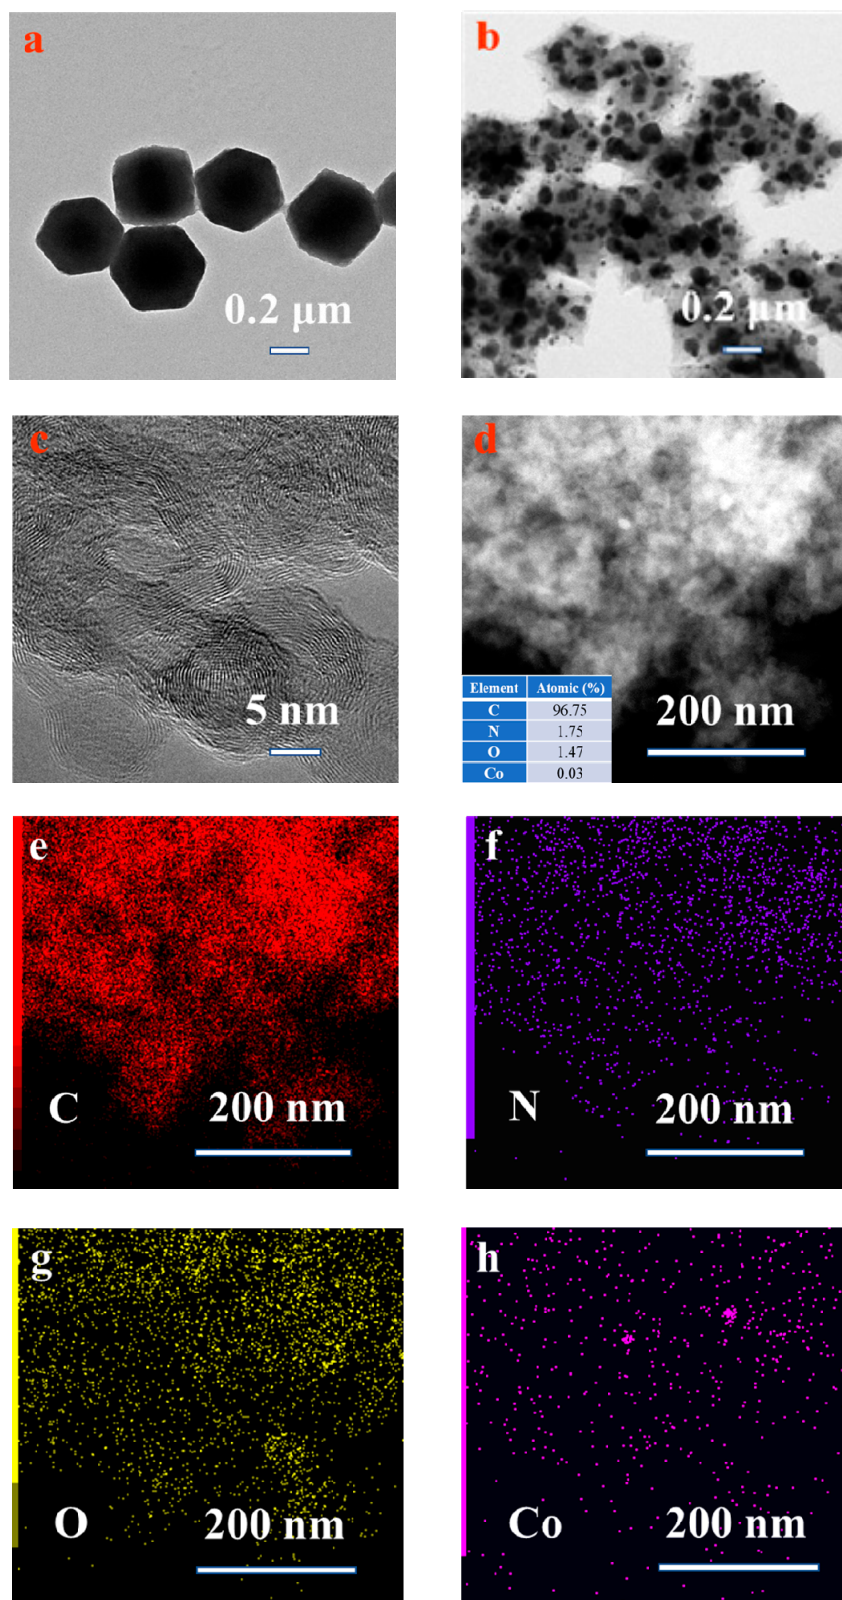

**Figure S2** TEM images of (a) ZIF-67 and (b) NPC-900; (c) HRTEM image of O-NPC-120. (d) STEM-mapping images and the EDS data of O-NPC-120. (e) - (h) EDS of O-NPC-120.

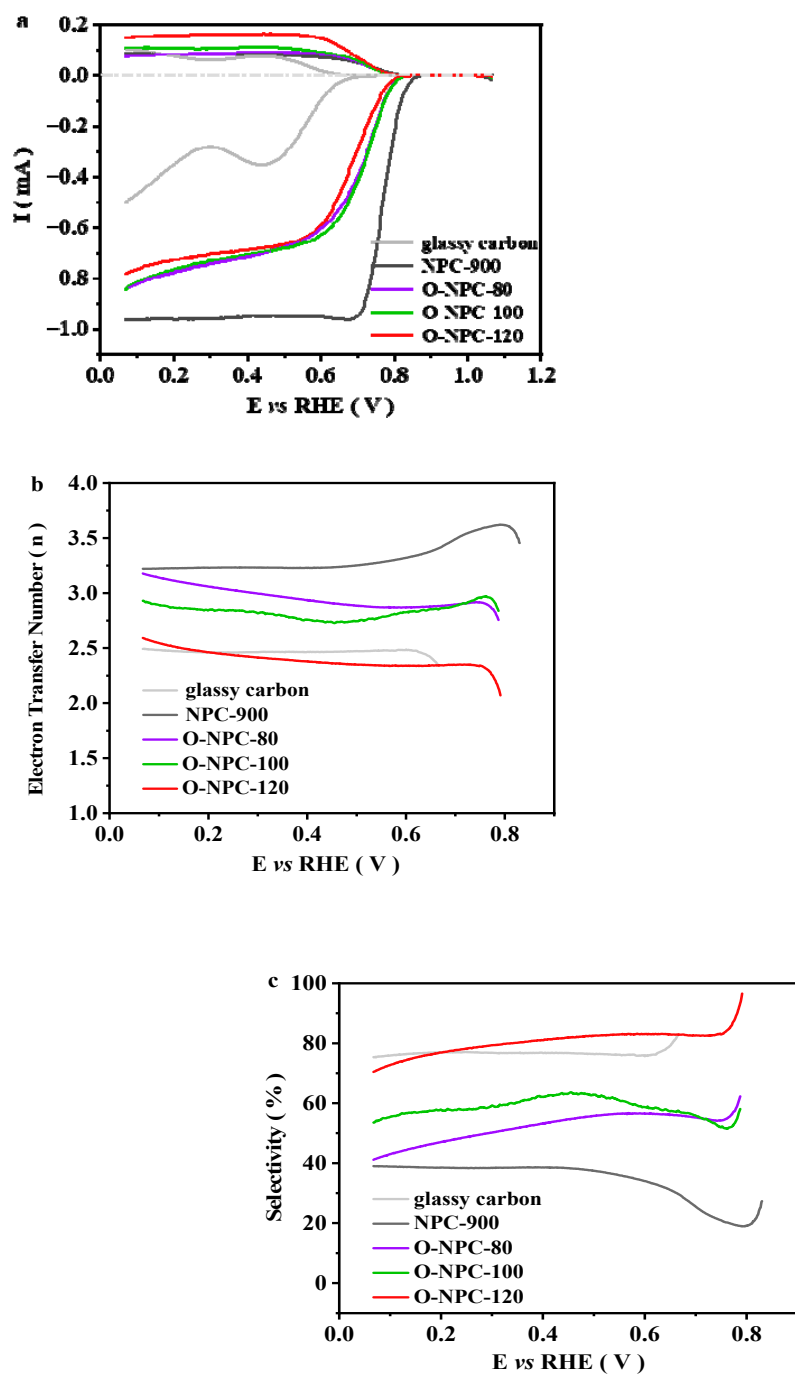

**Figure S3** Comparison of  $2e^-$  ORR performance between glassy carbon electrode (GCE) and catalyst loading GCE. (a) RRDE polarization curve. (b) electron transfer number. (c)  $H_2O_2$  selectivity.

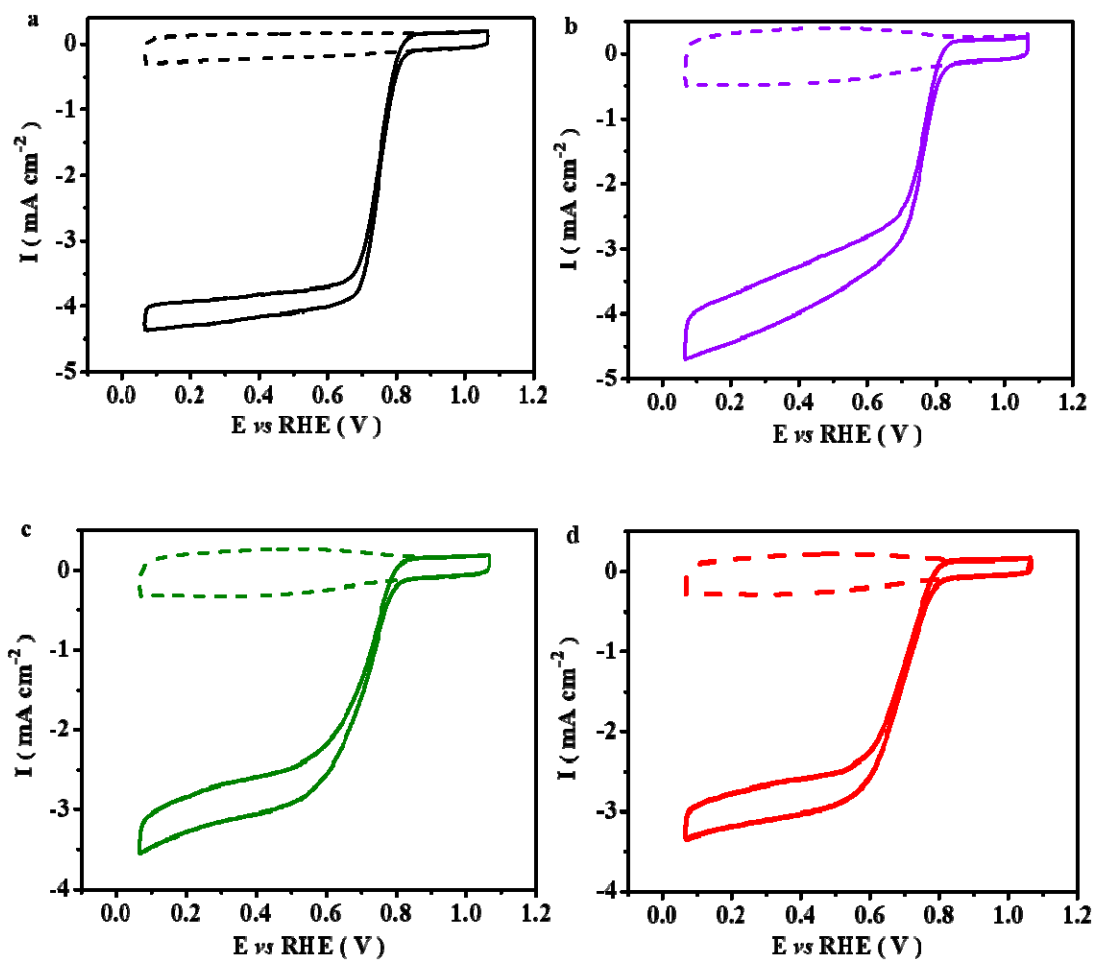

**Figure S4** CV curves of the catalysts at 1600 rpm and  $50 \text{ mV s}^{-1}$  in  $\text{N}_2$ - and  $\text{O}_2$ -saturated electrolyte. (a) NPC-900. (b) O-NPC-80. (c) O-NPC-100. (d) O-NPC-120.

All dashed lines:  $\text{N}_2$ ; all solid lines:  $\text{O}_2$ .

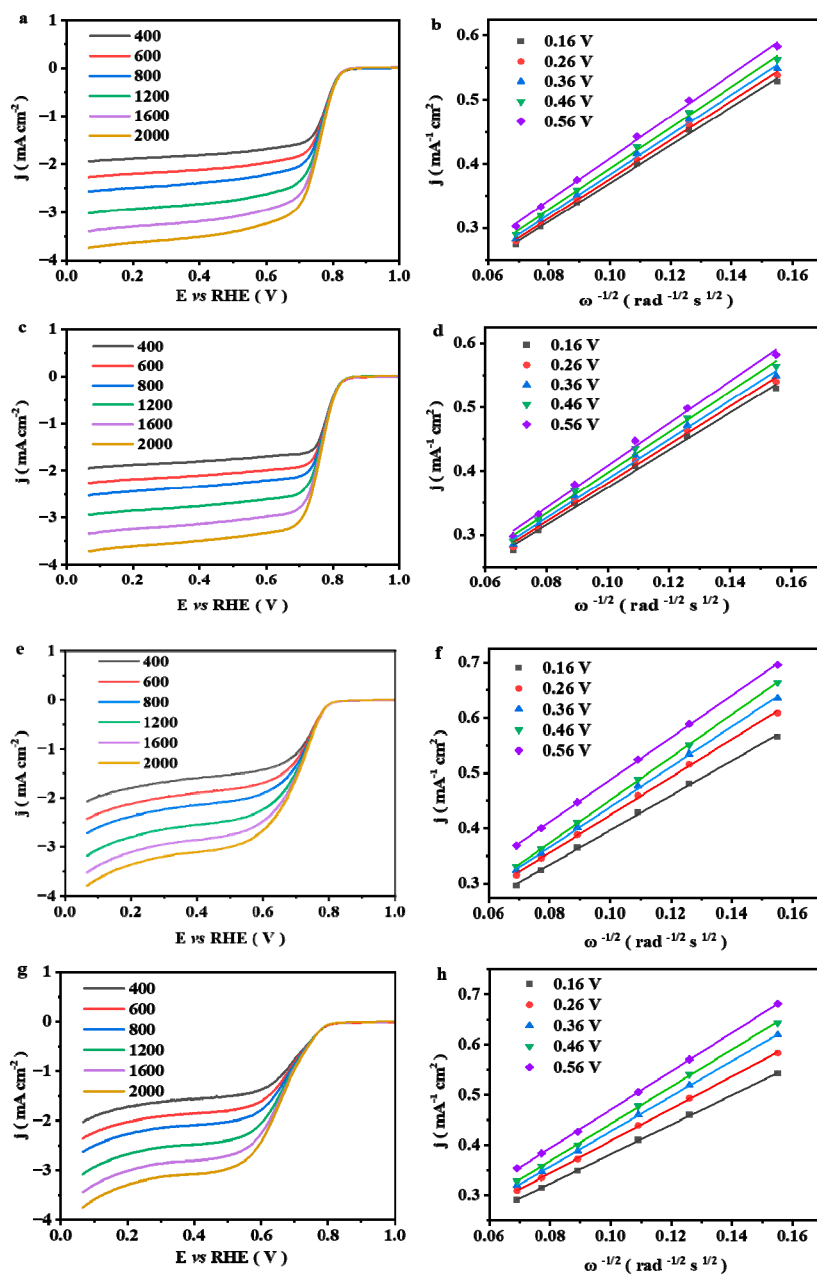

**Figure S5** LSV curves of (a) NPC-900, (c) O-NPC-80, (e) O-NPC-100, (g) O-NPC-120 measured at different rotation speeds in O<sub>2</sub> saturated 0.1 M KOH. (b) NPC-900, (d) O-NPC-80, (f) O-NPC-100, (h) O-NPC-120 are Koutecky-Levich plots based on corresponding LSV curves.

The electron transfer number was further calculated through the K-L equation. The  $n$  value is 3.22, 3.05, 2.85 and 2.51 for NPC-900, O-NPC-80, O-NPC-100 and O-NPC-120, respectively. These  $n$  values are consistent with the measured results of RRDE.

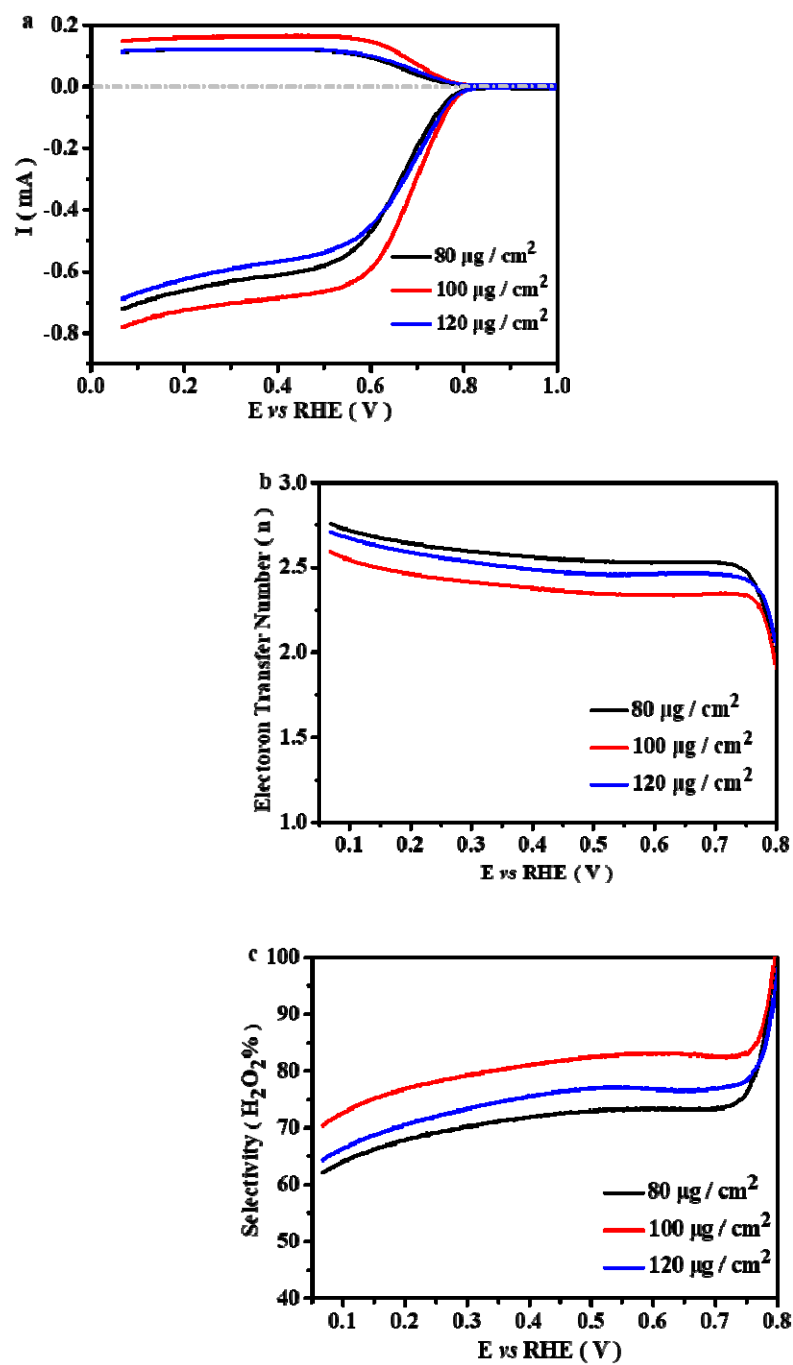

**Figure S6** Effect of O-NPC-120 loading on catalytic performance of 2e<sup>-</sup> ORR. (a) RRDE polarization curve. (b) electron transfer number. (c)  $\text{H}_2\text{O}_2$  selectivity.



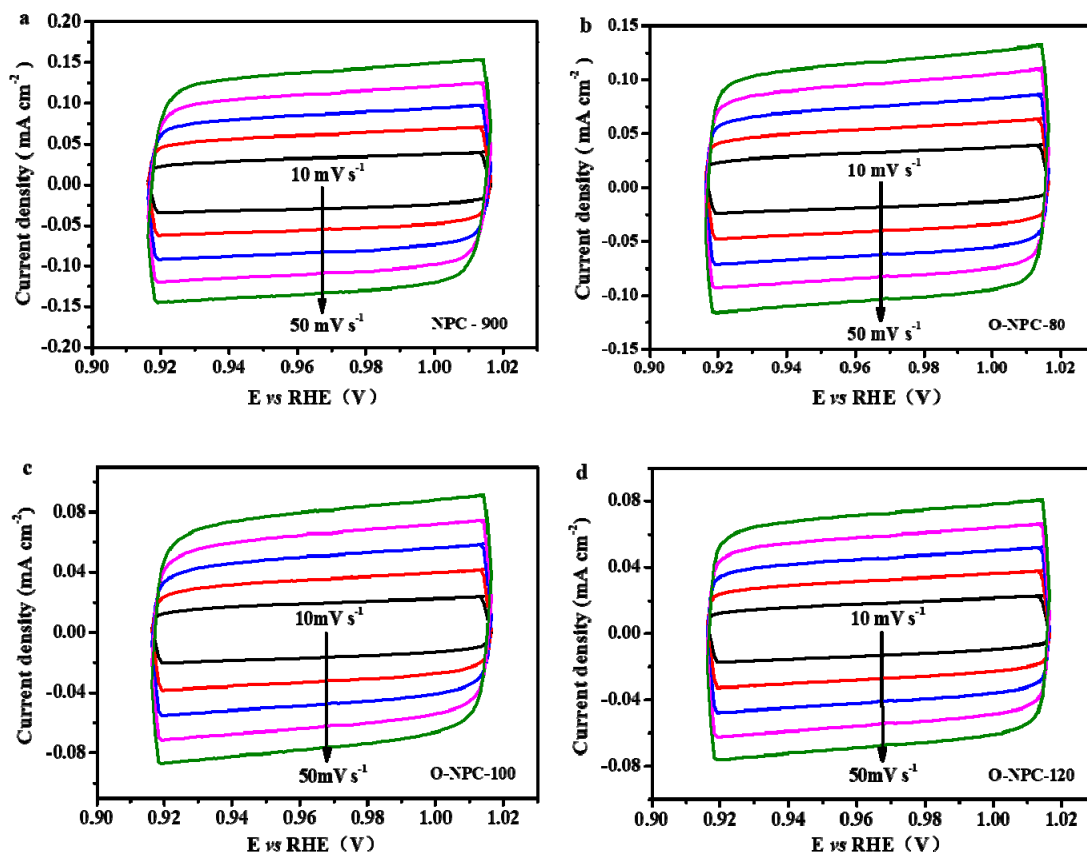

**Figure S7** Cyclic voltammogram in the non-faradic potential region at varying scan rates for the samples of (a) NPC-900. (b) O-NPC-80. (c) O-NPC-100. (d) O-NPC-120.

$C_{dl}$  is obtained from Figure S3 after calculation with the following equation:

$$C_{dl} = (J_a - J_c) / 2$$

Where,  $J_a$  is the capacitance current density at 0.963V (vs. RHE) during voltage forward scanning,  $J_c$  is the capacitance current density at 0.963V (vs. RHE) during negative voltage scanning.



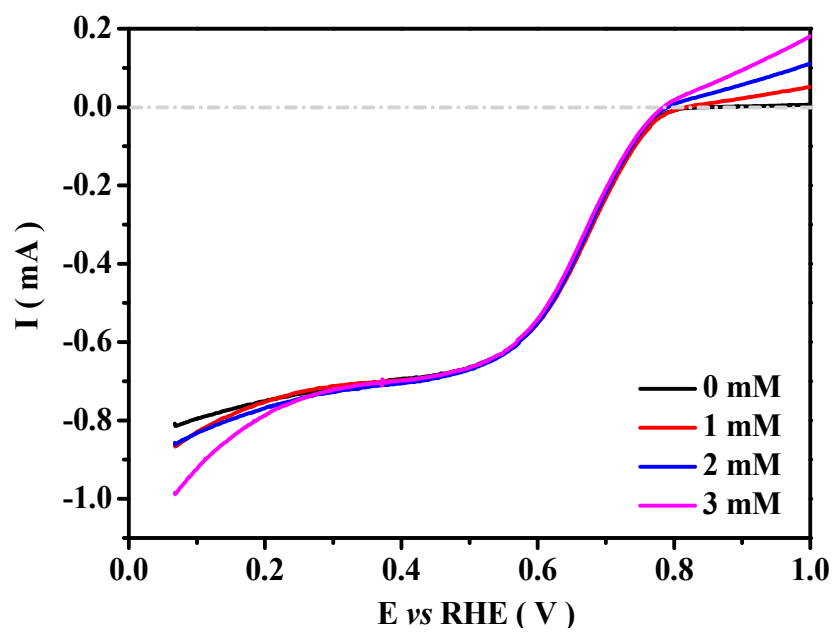

**Figure S8** LSV curves of O-NPC-120 in 0.1M KOH solution with  $H_2O_2$  concentrations of 0 mM, 1 mM, 2 mM, and 3 mM.

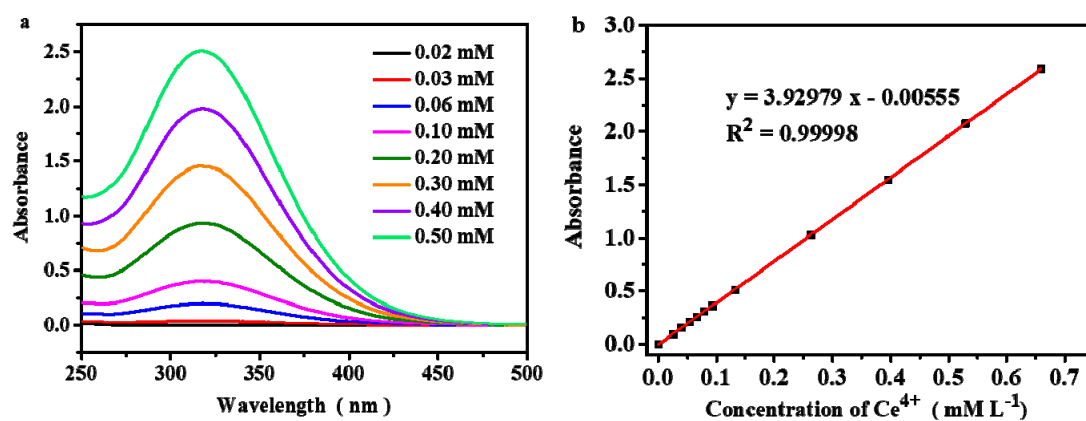

**Figure S9** (a) UV-Vis spectra of  $\text{Ce}^{4+}$  solutions with different concentrations. (b) is the standard curve corresponding to (a).

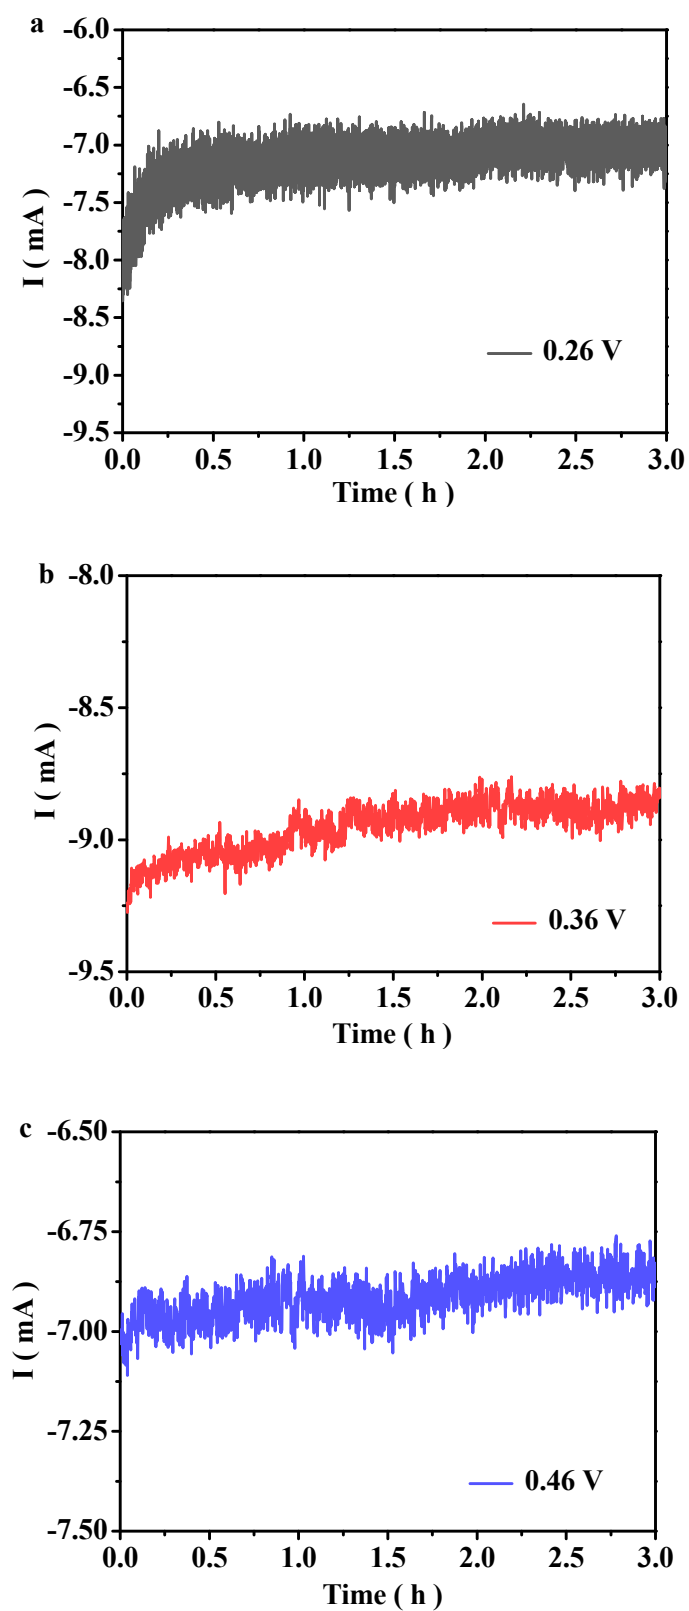

**Figure S10**  $i$ - $t$  curves of O-NPC-120 in 0.1 M KOH electrolyte under different voltages. (a) 0.26 V. (b) 0.36 V. (c) 0.46 V. Loading capacity of catalyst:  $100 \mu\text{g} / \text{cm}^2$ .

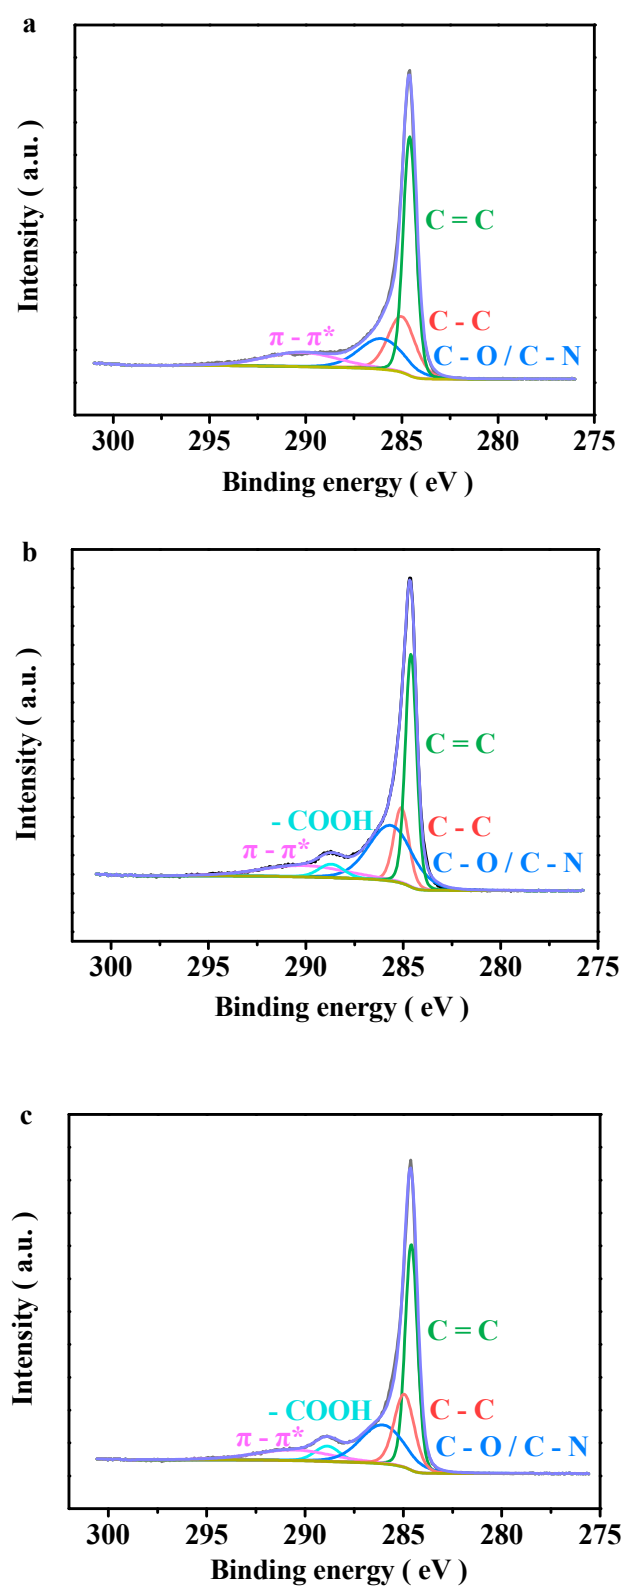

**Figure S11** The XPS-characterized C 1s spectra of (a) NPC-900, (b) O-NPC-80 and (c) O-NPC-100, respectively.

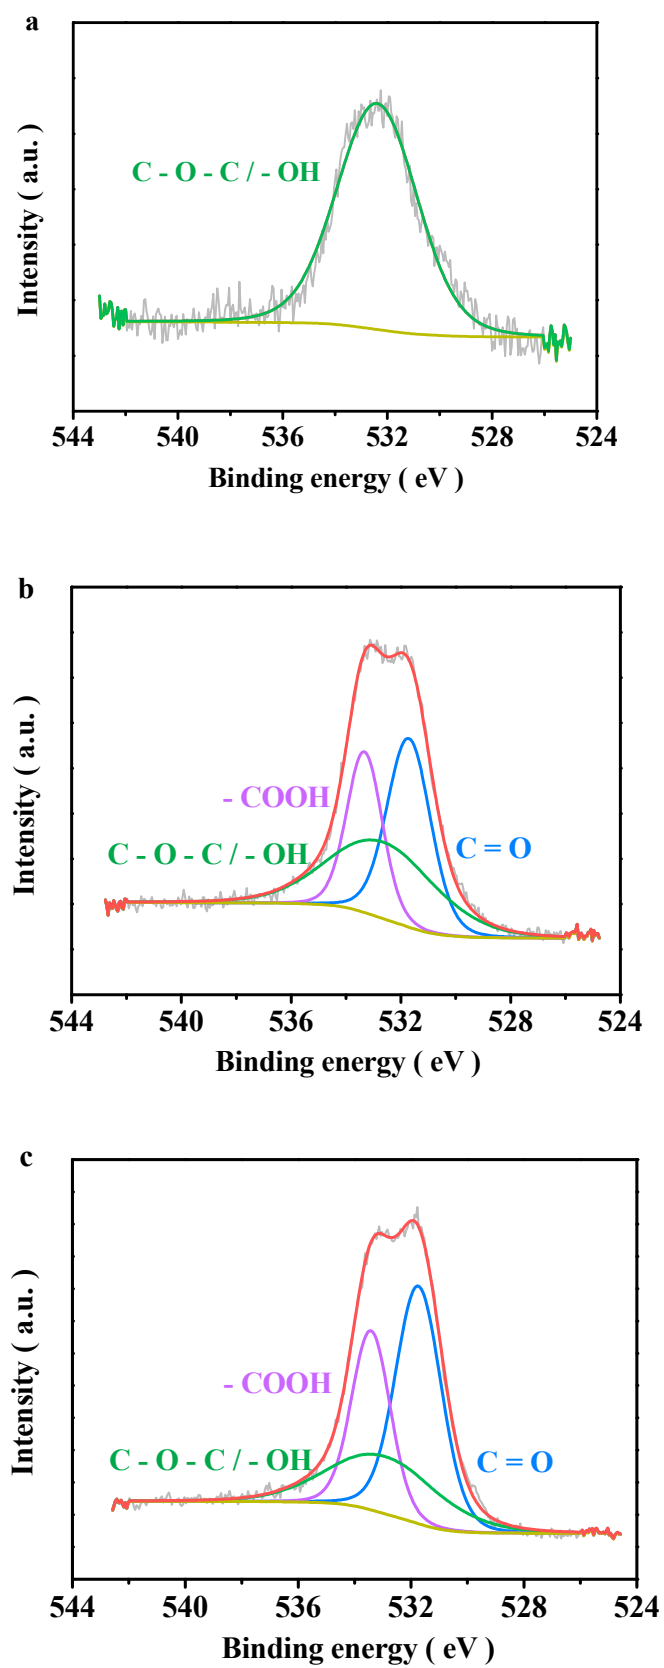

**Figure S12** O 1s spectra characterized by XPS (a) NPC-900, (b) O-NPC-80 and (c) O-NPC-100, respectively.

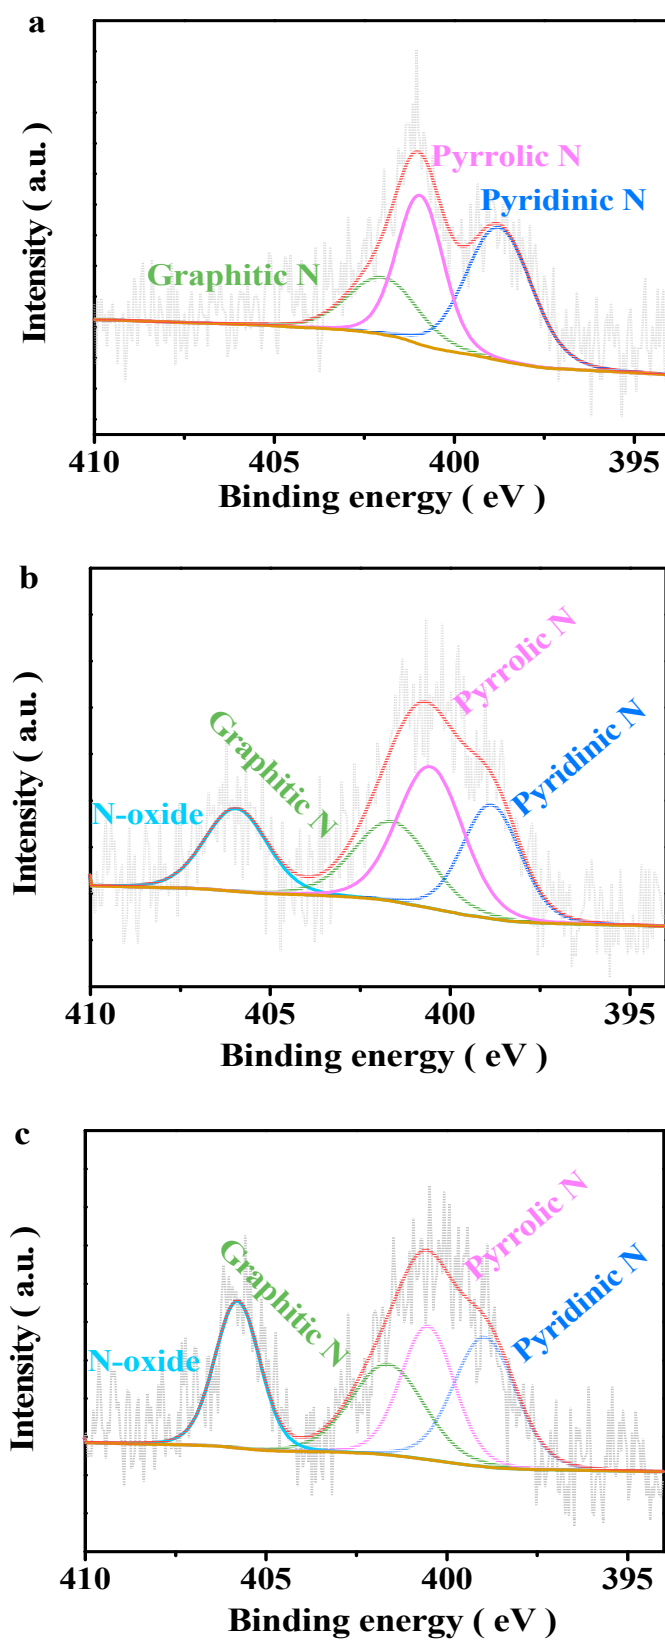

**Figure S13** N 1s spectra characterized by XPS (a) NPC-900, (b) O-NPC-80 and (c) O-NPC-100, respectively.

**Table S1. C, N, O contents of catalysts detected by XPS**

| Sample    | Peak BE (eV) | Atomic (%) | element |
|-----------|--------------|------------|---------|
| NPC-900   | 284.60       | 95.59      | C 1s    |
|           | 401.28       | 1.25       | N 1s    |
|           | 531.60       | 3.16       | O 1s    |
| O-NPC-80  | 284.60       | 87.39      | C 1s    |
|           | 402.43       | 1.04       | N 1s    |
|           | 531.60       | 11.57      | O 1s    |
| O-NPC-100 | 284.60       | 86.25      | C 1s    |
|           | 402.87       | 1.09       | N 1s    |
|           | 531.60       | 12.66      | O 1s    |
| O-NPC-120 | 284.60       | 84.15      | C 1s    |
|           | 402.88       | 1.02       | N 1s    |
|           | 531.60       | 14.53      | O 1s    |



**Table S2. Different C types and contents in catalysts determined from XPS analysis results**

| Sample    | Peak BE (eV) | Atomic (%) | Carbon states            |
|-----------|--------------|------------|--------------------------|
| NPC-900   | 284.60       | 44.07      | sp <sup>2</sup> C: C = C |
|           | 285.01       | 21.82      | sp <sup>3</sup> C: C - C |
|           | 286.06       | 19.40      | C-O / C-N                |
|           | 290.59       | 14.71      | $\pi \rightarrow \pi^*$  |
| O-NPC-80  | 284.60       | 35.13      | sp <sup>2</sup> C: C = C |
|           | 285.10       | 15.27      | sp <sup>3</sup> C: C - C |
|           | 286.05       | 32.37      | C-O / C-N                |
|           | 288.89       | 4.50       | - COOH                   |
| O-NPC-100 | 290.62       | 12.73      | $\pi \rightarrow \pi^*$  |
|           | 284.60       | 40.72      | sp <sup>2</sup> C: C = C |
|           | 285.05       | 21.15      | sp <sup>3</sup> C: C - C |
|           | 286.06       | 21.26      | C-O / C-N                |
| O-NPC-120 | 288.86       | 5.41       | - COOH                   |
|           | 290.59       | 11.46      | $\pi \rightarrow \pi^*$  |
|           | 284.60       | 32.01      | sp <sup>2</sup> C: C = C |
|           | 285.06       | 25.29      | sp <sup>3</sup> C: C - C |
|           | 286.02       | 25.10      | C-O / C-N                |
|           | 288.89       | 5.95       | - COOH                   |
|           | 290.63       | 11.65      | $\pi \rightarrow \pi^*$  |

**Table S3. Different O types and contents in catalysts determined from XPS analysis results**

| Sample    | Peak BE (eV) | Atomic (%) | Oxygen states    |
|-----------|--------------|------------|------------------|
| NPC-900   | 532.39       | 100        | C - O - C / - OH |
| O-NPC-80  | 531.71       | 37.08      | C = O            |
|           | 532.66       | 37.18      | C - O - C / - OH |
|           | 533.37       | 25.74      | - COOH           |
| O-NPC-100 | 531.74       | 45.22      | C = O            |
|           | 532.75       | 26.21      | C - O - C / - OH |
|           | 533.40       | 28.58      | - COOH           |
| O-NPC-120 | 531.76       | 43.50      | C = O            |
|           | 532.77       | 25.43      | C - O - C / - OH |
|           | 533.38       | 31.07      | - COOH           |

**Table S4. Different N types and contents in catalysts determined from XPS analysis results**

| Sample    | Peak BE (eV) | Atomic (%) | element     |
|-----------|--------------|------------|-------------|
| NPC-900   | 398.76       | 44.45      | Pyridinic N |
|           | 400.95       | 35.22      | Pyrrolic N  |
|           | 401.98       | 20.33      | Graphitic N |
| O-NPC-80  | 398.85       | 24.44      | Pyridinic N |
|           | 400.56       | 34.22      | Pyrrolic N  |
|           | 401.61       | 22.30      | Graphitic N |
| O-NPC-100 | 405.95       | 19.04      | N-oxide     |
|           | 398.96       | 28.44      | Pyridinic N |
|           | 400.53       | 25.10      | Pyrrolic N  |
|           | 401.63       | 23.16      | Graphitic N |
| O-NPC-120 | 405.79       | 23.30      | N-oxide     |
|           | 398.94       | 25.96      | Pyridinic N |
|           | 400.56       | 25.63      | Pyrrolic N  |
|           | 401.63       | 26.05      | Graphitic N |
|           | 405.71       | 22.36      | N-oxide     |

**Table S5 2e<sup>-</sup> ORR performance of some carbon-based catalysts**

| Catalyst                                  | electrolyte                                      | Onset potential<br>[ V <sub>RHE</sub> ] | Selectivity<br>[ % ] | Tafel<br>[ mV dec <sup>-1</sup> ] | Productivity                                                                                         | Ref       |
|-------------------------------------------|--------------------------------------------------|-----------------------------------------|----------------------|-----------------------------------|------------------------------------------------------------------------------------------------------|-----------|
| O-NPC-120                                 | 0.1 M KOH                                        | 0.79                                    | 83.1                 | 45.16                             | 2909.79 mmol g <sub>catalyst</sub> <sup>-1</sup> h <sup>-1</sup>                                     | This work |
| N-MCs                                     | 0.1 M KOH                                        | —                                       | 85                   | —                                 | —                                                                                                    | [1]       |
| Meso-C                                    | 0.1 M KOH                                        | ~ 0.7                                   | ~ 100                | —                                 | —                                                                                                    | [2]       |
| OXO-G/ NH <sub>3</sub> · H <sub>2</sub> O | 0.1 M KOH                                        | ~ 0.8                                   | >80                  | —                                 | 224.8 mmol g <sub>catalyst</sub> <sup>-1</sup> h <sup>-1</sup> at 0.2 V <sub>RHE</sub> (H type cell) | [3]       |
| N-FLG-8                                   | 0.1 M KOH                                        | 0.80                                    | >95                  | —                                 | 9.66 mol g <sub>catalyst</sub> <sup>-1</sup> h <sup>-1</sup> (flow cell, 1.8V)                       | [4]       |
| NOC-6M                                    | 0.1 M KOH                                        |                                         | 95.2                 | 59                                |                                                                                                      | [5]       |
| CB-Plasma                                 | 0.1 M KOH                                        |                                         | 100                  | —                                 |                                                                                                      | [6]       |
| GOMC                                      | 0.1 M KOH                                        | 0.78                                    | >90                  | 48                                | 24 mM (H type cell: 16 h)                                                                            | [23]      |
| CB + CTAB                                 | 0.1 M KOH                                        | 0.80                                    | >95                  | ~ 60                              | —                                                                                                    | [62]      |
| NT-3DFG                                   | 0.1 M KOH                                        | 0.79 ± 0.01                             | >94                  | 54.8 ± 1.8                        | —                                                                                                    | [63]      |
| CNT-F-0.6                                 | 0.05 M Na <sub>2</sub> SO <sub>4</sub><br>pH = 7 |                                         | 82 ~ 95              | 258                               | 7.40 mmol g <sup>-1</sup> h <sup>-1</sup> (GDE: 300 mL undivided cell)                               | [64]      |
| HCNFs                                     | 0.1 M KOH                                        | >0.80                                   | >89                  | 75.6                              | 45864 mM g <sup>-1</sup> h <sup>-1</sup> [flow cell (two-compartment cell)]                          | [65]      |
| B-C                                       | 0.1 M KOH                                        | 0.773                                   | >85                  | 78 (1M KOH)                       | 14720 mmol g <sup>-1</sup> h <sup>-1</sup> (solid-electrolyte cell)                                  | [66]      |

|           |                                      |        |     |      |                                                                                                       |      |
|-----------|--------------------------------------|--------|-----|------|-------------------------------------------------------------------------------------------------------|------|
| N-CMK3IL  | 0.5 M H <sub>2</sub> SO <sub>4</sub> |        | >95 | —    | 159.9 mmol g <sub>catalyst</sub> <sup>-1</sup> h <sup>-1</sup> at 0.1 V <sub>RHE</sub> (H type cell)  | [71] |
|           | 0.1 M K <sub>2</sub> SO <sub>4</sub> |        | >83 | —    | 547.07 mmol g <sub>catalyst</sub> <sup>-1</sup> h <sup>-1</sup> at 0.2 V <sub>RHE</sub> (H type cell) |      |
|           | 0.1 M KOH                            |        | >85 | —    | 561.7 mmol g <sub>catalyst</sub> <sup>-1</sup> h <sup>-1</sup> at 0.1 V <sub>RHE</sub> (H type cell)  |      |
| NPCNS     | 0.1 M KOH                            | —      | >85 | 67.8 | 223.4 mmol g <sub>catalyst</sub> <sup>-1</sup> h <sup>-1</sup> at 0.3 V <sub>RHE</sub> (H type cell)  | [72] |
| N-doped C | 0.1 M KOH                            | 0.88 V | 93  | —    |                                                                                                       | [73] |
| CMK3      | 0.1 M KOH                            | ~ 0.80 | 90  | —    | —                                                                                                     | [74] |
| O-CNT     | 0.1 M KOH                            |        | >85 | 47   | 111.71 mmol g <sup>-1</sup> h <sup>-1</sup>                                                           | [75] |
| BNC       | 0.1 M KOH                            | 0.80   | >80 | —    | —                                                                                                     | [76] |

## References

- [1] X. Sheng, N. Daems, B. Geboes, M. Kurttepli, S. Bals, T. Breugelmans, A. Hubin, I. F. Vankelecom, P. P. Pescarmona, N-doped ordered mesoporous carbons prepared by a two-step nanocasting strategy as highly active and selective electrocatalysts for the reduction of O<sub>2</sub> to H<sub>2</sub>O<sub>2</sub>, *Appl. Catal. B* 176 (2015) 212 - 224.
- [2] S. Chen, Z. Chen, S. Siahrostami, T. R. Kim, D. Nordlund, D. Sokaras, S. Nowak, J. W. To, D. Higgins, R. Sinclair, T. Jaramillo, J. Nørskov, Z. Bao, Defective Carbon-Based Materials for the Electrochemical Synthesis of Hydrogen Peroxide, *ACS Sustainable Chem. Eng.* 6 (2018) 311 - 317.
- [3] L. Han, Y. Y. Sun, S. Li, C. Cheng, C. E. Halbig, P. Feicht, J. L. Hübner, P. Strasser, S. Eigler, In-Plane Carbon Lattice-Defect Regulating Electrochemical Oxygen Reduction to Hydrogen Peroxide Production over Nitrogen-Doped Graphene, *ACS Catal.* 9 (2019) 1283 - 1288.
- [4] L. Li, C. Tang, Y. Zheng, B. Q. Xia, X. L. Zhou, H. L. Xu, S. Z. Qiao, Tailoring Selectivity of Electrochemical Hydrogen Peroxide Generation by Tunable Pyrrolic-Nitrogen-Carbon, *Adv. Energy Mater.* 10 (2020) 852 - 863.
- [5] C. Y. Zhang, G. Z. Liu, B. Ning, S. R. Qian, D. N. Zheng, L. Wang, Highly efficient electrochemical generation of H<sub>2</sub>O<sub>2</sub> on N / O co-modified defective carbon, *Int. J. Hydrog. Energy* 46 (2021) 14277 - 14287.
- [6] Z. Wang, Q. K. Li, C. H. Zhang, Z. H. Cheng, W. Y. Chen, E. A. McHugh, R. A. Carter, B. I. Yakobson, J. M. Tour, Hydrogen Peroxide Generation with 100% Faradaic Efficiency on Metal-Free Carbon Black, *ACS Catal.* 11 (2021) 2454 - 2459.
